# Supplementary material for: Highly porous gold supraparticles as surface-enhanced Raman spectroscopy (SERS) substrates for sensitive detection of environmental contaminants
Source: Royal Society of Chemistry journal article supplement (doi:10.1039/d2ra06248h), 2022-01-01
Supplement: d2ra06248h1.pdf [file d2ra06248h1.pdf]

## Supporting information

1

### 2 **Highly Porous Gold Supraparticles as Surface-enhanced Raman** 3 **Spectroscopy (SERS) Substrates for Sensitive Detection of** 4 **Environmental Contaminants**

5 Seju Kang<sup>a,b\*</sup>, Wei Wang<sup>a,b</sup>, Asifur Rahman<sup>a,b</sup>, Wonil Nam<sup>c</sup>, Wei Zhou<sup>c</sup>, Peter J. Vikesland<sup>a,b\*</sup>

6 <sup>a</sup>Department of Civil and Environmental Engineering, Virginia Tech, Blacksburg, Virginia;

7 <sup>b</sup>Virginia Tech Institute of Critical Technology and Applied Science (ICTAS) Sustainable  
8 Nanotechnology Center (VTSuN), Blacksburg, Virginia;

9 <sup>c</sup>Department of Electrical and Computer Engineering, Virginia Tech, Blacksburg, Virginia;

10

11 \* Corresponding authors: seju@vt.edu, pvikes@vt.edu

12 Postal address: 415 Durham, Virginia Tech, Blacksburg 24061, VA, USA

13

14 *Keywords: Supraparticles, surface-enhanced Raman spectroscopy (SERS), environmental*  
15 *contaminants, porosity, self-assembly,*

16

17

18

19 **Total Pages: 5**

20 **Figures S3            Pages S2**

21 **Tables S1-S3        Pages S3-S4**

22 **SI References        Page S5**

23

24

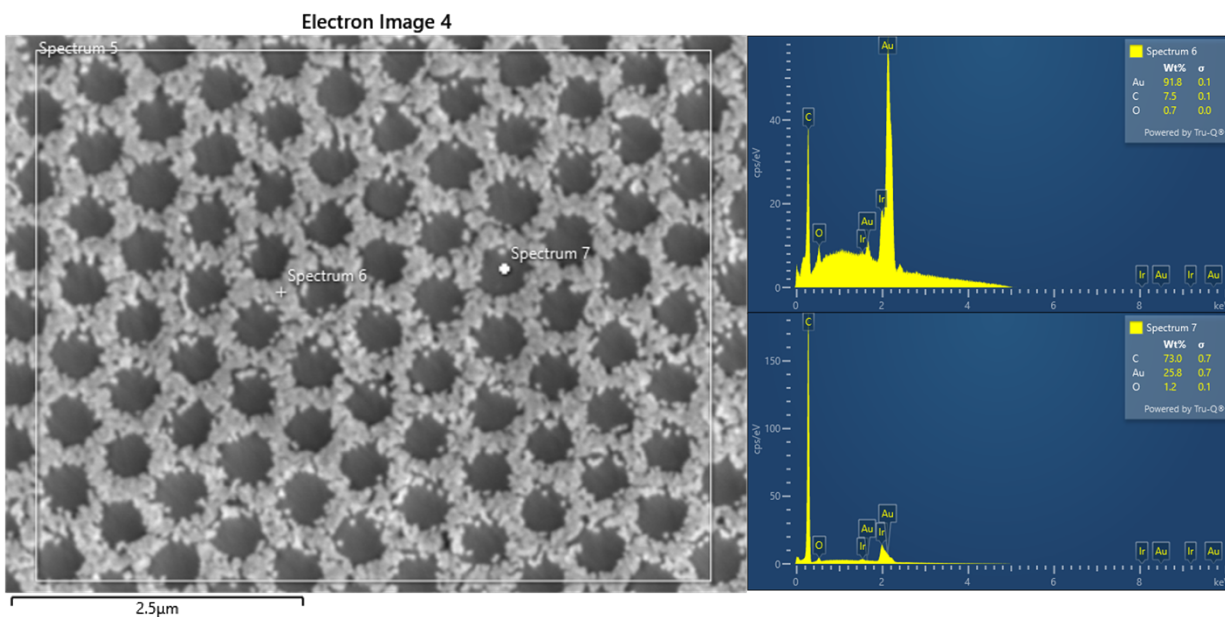

25  
 26 **Figure S1.** Energy dispersive spectroscopy (EDS) spectra of the Au/PS supraparticle from two  
 27 different positions; a polystyrene (PS) nanoparticle and Au nanoparticle aggregates. The mass  
 28 percent of Au and C, a representative of PS from EDS spectra.  
 29

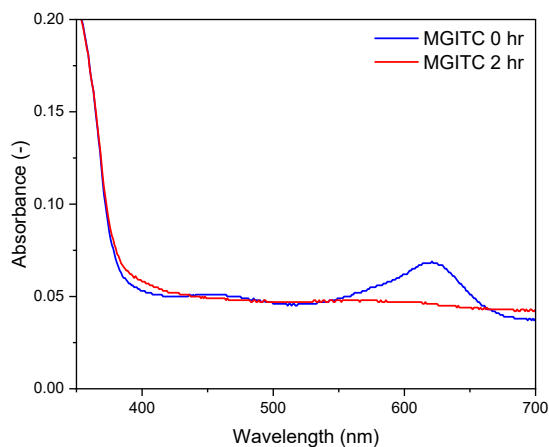

30  
 31 **Figure S2.** Absorbance spectra of MGITC solution before and after 2 hrs of contact with the  
 32 porous Au supraparticle.  
 33  
 34

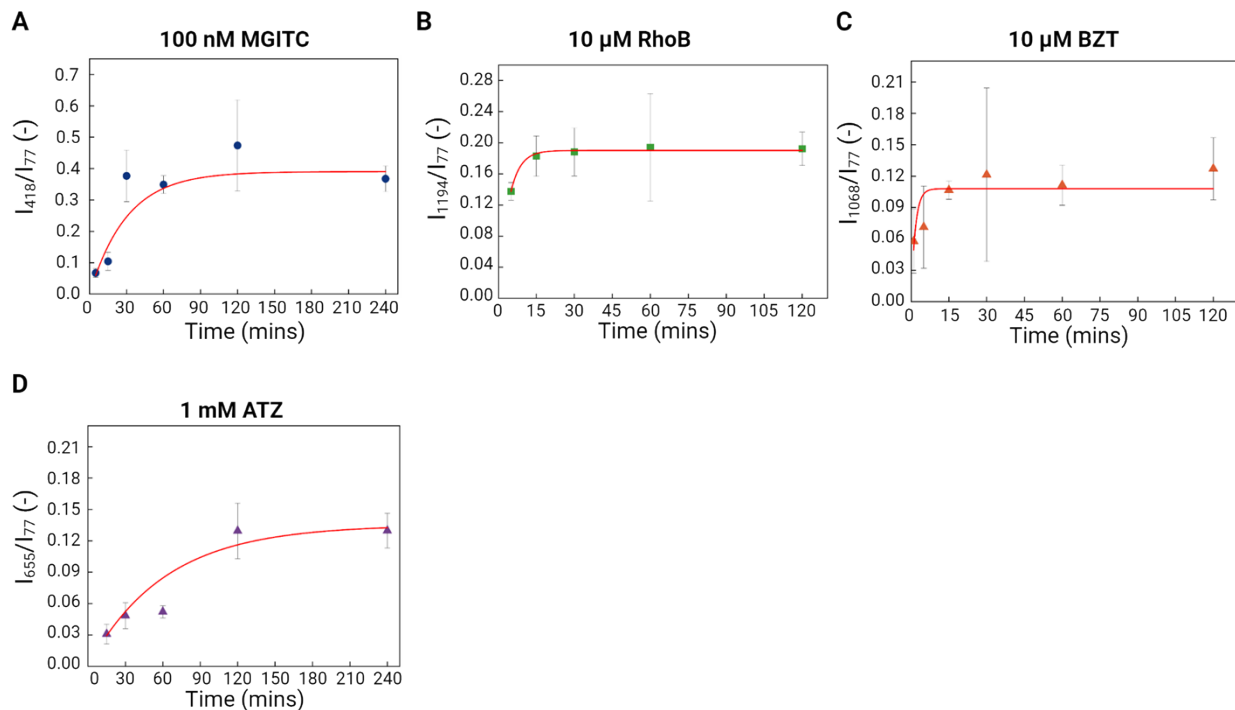

35

36 **Figure S3.** (A)-(D) Sorption kinetics of environmental contaminants (100 nM MGITC, 10  $\mu$ M  
 37 RhoB, 10  $\mu$ M BZT, 1 mM ATZ) based on the Raman intensity increases of their characteristic  
 38 peaks with time. The symbols and error bars indicate the means and standard deviation of the  
 39 normalized Raman signals from the 400 SERS spectra.

40

41

42

43

44

45

46

47

48

49

50

51

52

53

54

55

56

57

58

59

60

61

62 **Table S1.** Gene sequences for *intI1*

| 5'- sequences -3' |                                                                                           |
|-------------------|-------------------------------------------------------------------------------------------|
| <i>intI1</i>      | GTGCACGGGCATGGTGGCTGAAGGACCAGGCCGAGGGCCGCA<br>CGGCGTTGCGCTTCCCGACGCCCTTGAGCGGAAGTATCCGCGC |

63

64

65

66 **Table S2.** SERS peaks and corresponding assignments

| Wavenumber (cm <sup>-1</sup> ) | Assignments                                           | ref |
|--------------------------------|-------------------------------------------------------|-----|
| MGITC                          |                                                       |     |
| 418                            | Out-of-plane benzene ring deformation                 | 1   |
| 1171                           | In-plane benzene $\nu_9$ mode                         | 2   |
| 1364                           | The aromatic ring stretching mode                     | 2   |
| 1388                           | In-plane C-C/C-H stretch                              | 3   |
| RhoB                           |                                                       |     |
| 1194                           | C-C bridge band stretching                            | 4   |
| 1279                           | Aromatic C-H bending aromatic                         | 4   |
| 1506                           | Aromatic C-C bending                                  | 5   |
| BZT                            |                                                       |     |
| 419                            | C-S stretching, C-C-C ring bending (ring breathing)   | 6   |
| 994                            | C-H ring bending                                      | 6   |
| 1021                           | C-C-C bending and C-S stretching                      | 6   |
| 1068                           | C-C-C bending and C-S stretching                      | 6   |
| ATZ                            |                                                       |     |
| 655                            | Asymmetric deformation N-C-N/C-N-C and ring breathing | 7   |
| 961                            | Asymmetric deformation N-C-N/C-N-C and ring breathing | 7   |
| Gene segment                   |                                                       |     |
| 730                            | Adenine                                               | 8   |
| 959                            | Deoxyribose                                           | 9   |
| 1315                           | Guanine                                               | 10  |
| 1335                           | Adenine                                               | 8   |
| 1458                           | Deoxyribose                                           | 10  |

67

68

69

70

71

72 **Table S3.** The composition of wastewater influent

| pH                                  | Na <sup>+</sup>  | Mg <sup>2+</sup> | Si <sup>4+</sup> | P <sup>+</sup>                | K <sup>+</sup>                | Ca <sup>+</sup> |
|-------------------------------------|------------------|------------------|------------------|-------------------------------|-------------------------------|-----------------|
| 6.51                                | 158.27<br>± 5.01 | 6.58<br>± 0.37   | 8.06<br>± 0.70   | 6.10<br>± 0.30                | 16.67<br>± 0.27               | 12.38<br>± 0.41 |
| Specific Conductivity<br>(μS/cm)    | F <sup>-</sup>   | Cl <sup>-</sup>  | NO <sup>2-</sup> | PO <sub>4</sub> <sup>3-</sup> | SO <sub>4</sub> <sup>2-</sup> | Br <sup>-</sup> |
| 1172.0                              | 0.10<br>± 0.01   | 135.39<br>± 0.02 | 0.35<br>± 0.02   | 5.74<br>± 0.08                | 21.76<br>± 0.28               | 0.12<br>± 0.00  |
| Total organic carbon<br>(TOC, mg/L) |                  |                  |                  |                               |                               |                 |
| 5.38                                |                  |                  |                  |                               |                               |                 |

73 The cation and anion compositions were analyzed by using inductively-coupled plasma-mass  
 74 spectrometer (ICP-MS) and ion chromatography (IC). The sample was filtered through 0.45 μm  
 75 polytetrafluoroethylene (PTFE) filter.

76

77

78

79

80

81

82

83

84

85

86

87

88

89

90

91

92

## 93 References

- 94 1 A. Kamińska, I. Dziecieliwski, J. L. Weyher, J. Waluk, S. Gawinkowski, V. Sashuk, M.  
95 Fiałkowski, M. Sawicka, T. Suski, S. Porowski and R. Hołyst, *J. Mater. Chem.*, 2011, **21**,  
96 8662.
- 97 2 M. Li, J. Zhang, S. Suri, L. J. Sooter, D. Ma and N. Wu, *Anal. Chem.*, 2012, **84**, 2837–  
98 2842.
- 99 3 W. Leng and P. J. Vikesland, *Langmuir*, 2014, **30**, 8342–8349.
- 100 4 S. Aghajani, A. Accardo and M. Tichem, *ACS Appl. Nano Mater.*, 2020, **3**, 5665–5675.
- 101 5 V. Moreno, K. Murtada, M. Zougagh and Á. Ríos, *Spectrochim. Acta Part A Mol. Biomol.*  
102 *Spectrosc.*, 2019, **223**, 117302.
- 103 6 F. Madzharova, Z. Heiner and J. Kneipp, *J. Phys. Chem. C*, 2020, **124**, 6233–6241.
- 104 7 S. Bonora, E. Benassi, A. Maris, V. Tugnoli, S. Ottani and M. Di Foggia, *J. Mol. Struct.*,  
105 2013, **1040**, 139–148.
- 106 8 S. Dick and S. E. J. Bell, *Faraday Discuss.*, 2017, **205**, 517–536.
- 107 9 Y. Li, T. Gao, G. Xu, X. Xiang, X. Han, B. Zhao and X. Guo, *J. Phys. Chem. Lett.*, 2019,  
108 **10**, 3013–3018.
- 109 10 A. J. Ruiz-Chica, M. A. Medina, F. Sánchez-Jiménez and F. J. Ramírez, *J. Raman*  
110 *Spectrosc.*, 2004, **35**, 93–100.

111
